# Supplementary material
Source: Research Square preprint supplement (doi:10.21203/rs.3.rs-9880513/v1)
Supplement: Supplementary file 1 [file e3267e7164e4b8fca1cd7625.docx]

**Table 1:** Socio-demographic characteristics of adults with T2DM at Felegehiwot Comprehensive Specialized Hospital, Bahir Dar, Northwest Ethiopia, March-May, 2017 (n=286).

| **Variable** | **Category** | **Frequency** | **Percent** |
| --- | --- | --- | --- |
| Religion | Orthodox | 256 | 89.5 |
| Muslim | 26 | 9.1 |
| **Others | 4 | 1.4 |
| Marital Status | Married | 209 | 73.1 |
| Single | 7 | 2.4 |
| Widowed | 45 | 15.7 |
| Divorced | 25 | 8.7 |
| Educational level | Unable to read &write | 97 | 33.9 |
| Read & write | 25 | 8.7 |
| Primary education | 46 | 16.1 |
| Secondary education | 33 | 11.5 |
| College and above | 85 | 29.7 |
| Occupation | Government employee | 78 | 27.3 |
| Non-governmental employee | 10 | 3.5 |
| Merchant | 31 | 10.8 |
| Farmer | 25 | 8.7 |
| Retired | 43 | 15.0 |
| House wife | 91 | 31.8 |
| Daily laborer | 8 | 2.8 |
| Residence | Urban | 251 | 87.8 |
| Rural | 35 | 12.2 |
| Monthly Income(USD)** | ≤29USD | 50 | 17.5 |
| 29-61.89USD | 65 | 22.7 |
| ≥61.90USD | 171 | 59.8 |

*Others: Protestant and Catholic **1USD= 22.65 Birr

**Table 2:** Lifestyle and health related characteristics of adults with T2DM at Felegehiwot Comprehensive Specialized Hospital, Bahir Dar, Northwest Ethiopia, March-May, 2017 (n=286).

| **Variable** | **Category** | **Frequency** | **Percent** |
| --- | --- | --- | --- |
| Smoking status | Non-smoker | 265 | 92.7 |
| Former-smoker | 18 | 6.3 |
| Current-smoker | 3 | 1.0 |
| Alcohol intake | Non-drinker | 148 | 51.7 |
| Moderate drinker | 83 | 29.0 |
| Excessive drinker | 55 | 19.2 |
| Dietary practice | Good dietary practice | 97 | 33.9 |
| Poor dietary practice | 25 | 8.7 |
| Level of physical activity | Low level physical activity | 78 | 27.3 |
| Moderate level of physical activity | 10 | 3.5 |
| High level of physical activity | 31 | 10.8 |
| Duration of illness (years) | 1-5 | 146 | 51.0 |
| 6-10 | 73 | 25.5 |
| ≥11 | 67 | 23.4 |
| Hypertension | No | 164 | 57.3 |
| Yes | 122 | 42.7 |
| Dyslipidemia | No | 264 | 92.3 |
| Yes | 22 | 7.7 |
| CVD | No | 279 | 97.6 |
| Yes | 7 2.4 | 7 2.4 |
| Other (HIV, asthma and CKD) | No | 249 | 87.1 |
| Yes | 37 | 12.9 |
| Glycemic control | Good | 80 | 28 |
| Poor | 206 | 72 |
| Anti-diabetic medication (Insulin) | No | 186 | 65.0 |
| Yes | 100 | 35.0 |
| Anti-diabetic medication (Metformin) | No | 60 | 21.0 |
| Yes | 226 | 79.0 |
| Anti-diabetic medication (Glibinclamide) | No | 183 | 64.0 |
| Yes | 103 | 36.0 |

**Table 3**: Factors associated with obesity among of adults with T2DM attending Felegehiwot Comprehensive Specialized Hospital, Bahir Dar, Northwest Ethiopia, March-May, 2017(n=286)

|  |  | **Obesity** | | **Odd Ratio** | |
| --- | --- | --- | --- | --- | --- |
| **Variables** | **Categories** | **Yes** | **No** | **COR (95% CI)** | **AOR (95% CI)** |
| Sex | Male | 14 | 128 | 1 | 1 |
| Female | 27 | 117 | 2.1(1.1-4.2) | 5.13(2.12-12.42)* |
| Marital Status | Married | 26 | 183 | 1 | 1 |
| Not married | 15 | 62 | 1.70(0.85-3.42) | 1.59(0.62-4.11) |
| Residence | Rural | 2 | 33 | 1 | 1 |
| Urban | 39 | 212 | 3.04(0.7-13.17) | 1.16(0.86-7.26) |
| Educational status | Unable to read & write | 11 | 86 | 1 | 1 |
| Read & write | 5 | 20 | 1.96(0.61-6.26) | 3.96(0.82-19.28) |
| Primary education | 5 | 41 | 0.95(0.31-2.92) | 1.15(0.28-4.65) |
| Secondary education | 4 | 29 | 1.08(0.32-3.65) | 1.87(0.41-8.58) |
| College and above | 16 | 69 | 1.81(0.79-4.16) | 3.43(0.95-12.34) |
| Income (ETB) | ≤29USD | 3 | 47 | 1 | 1 |
| 29-61.89USD | 4 | 61 | 1.03(0.22-4.81) | 0.98(0.19-5.05) |
| ≥61.90USD | 34 | 137 | 3.89(1.14-13.25) | 5.10(1.36-19.22)* |
| Alcohol consumption | Non-drinker | 13 | 135 | 1 | 1 |
| Moderate drinker | 13 | 70 | 1.93(0.85-4.38) | 1.91(0.74-4.90) |
| Excessive drinker | 15 | 40 | 3.89(1.7-8.86) | 3.65(1.32-10.05)* |
| Dietary practice | Good dietary practice | 10 | 150 | 1 | 1 |
| Poor Dietary practice | 31 | 95 | 4.89(2.29-10.44) | 4.23(1.81-9.86)* |
| Level of physical activity | Low level of physical activity | 5 | 65 | 1 | 1 |
| Moderate level of physical activity | 19 | 104 | 2.4(0.85-6.67) | 1.43(0.42-4.84) |
| High level of physical activity | 17 | 76 | 2.9(1.01-8.3) | 2.37(0.68-8.24) |
| Co-morbid disease | No | 13 | 113 | 1 | 1 |
| Yes | 28 | 132 | 1.84(0.9-3.73) | 2.19(0.96-5.00) |
| Insulin | No | 20 | 166 | 1 | 1 |
| Yes | 21 | 79 | 2.21(1.13-4.3) | 2.38(1.04-5.46) * |

*p value <0.05
